# Supplementary material for: Prader–Willi-Like Phenotype Caused by an Atypical 15q11.2 Microdeletion
Source: PubMed Central journal article supplement (PMC7073628; doi:10.3390/genes11020128), 2020-01-25
Supplement: genes-11-00128-s001.pdf [file genes-11-00128-s001.pdf]

1  
2  
3  
4

SUPPLEMENTARY FIGURES

**Figure S1:** (a) BMI curve and (b) height and weight evolution plotted on World Health Organization Growth Charts for Canada.

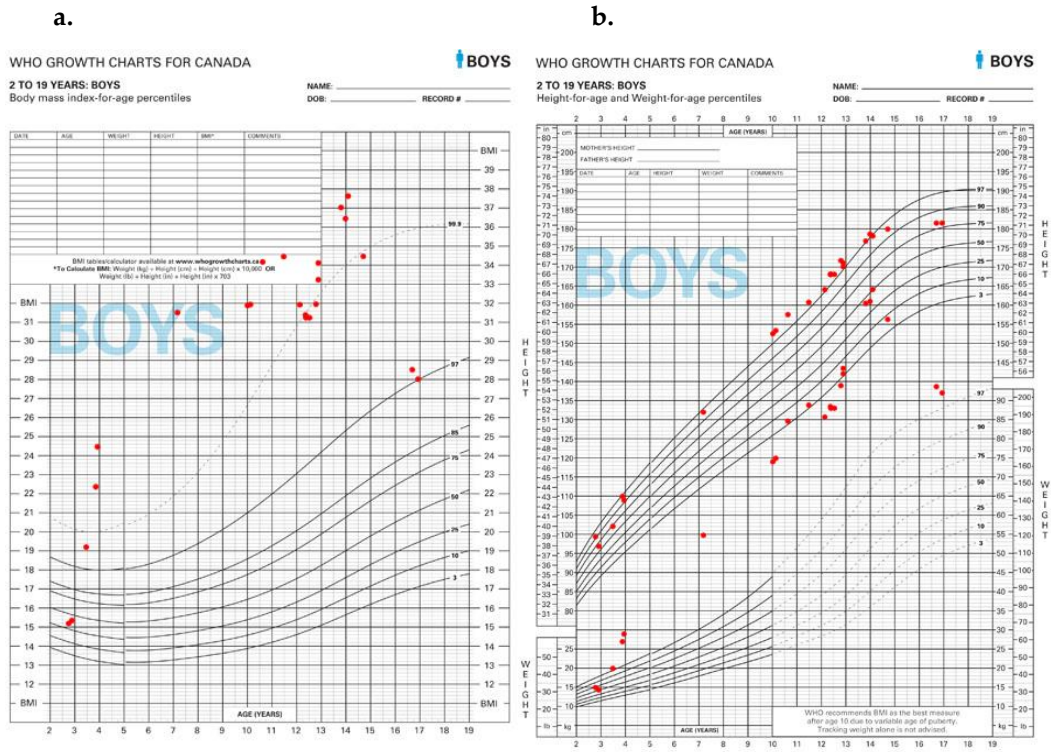

5

SOURCE: Based on World Health Organization (WHO) Child Growth Standards (2006) and WHO Reference (2007) adopted for Canada by Canadian Pediatric Society, Canadian Pediatric Endocrine Group (CPEEG), College of Family Physicians of Canada, Community Health Nurses of Canada and Dietitians of Canada.  
© Dietitians of Canada, 2014. Chart may be reproduced in its entirety (i.e., no changes) for non-commercial purposes only. [www.whogrowthcharts.ca](http://www.whogrowthcharts.ca)

SOURCE: The main chart is based on World Health Organization (WHO) Child Growth Standards (2006) and WHO Reference (2007) adopted for Canada by Canadian Pediatric Society, Canadian Pediatric Endocrine Group (CPEEG), College of Family Physicians of Canada, Community Health Nurses of Canada and Dietitians of Canada. The weight-for-age 10 to 19 years section was developed by CPEEG based on data from the US National Center for Health Statistics using the same procedure as the WHO growth charts.  
© Dietitians of Canada, 2014. Chart may be reproduced in its entirety (i.e., no changes) for non-commercial purposes only. [www.whogrowthcharts.ca](http://www.whogrowthcharts.ca)
